# Supplementary material for: The Annual Burden of Seasonal Influenza in the US Veterans Affairs Population
Source: PubMed Central journal article supplement (PMC5207669; doi:10.1371/journal.pone.0169344), 2017-01-03
Supplement: pone.0169344.s003.pdf [file pone.0169344.s003.pdf]

| Parameter                                                 |                                         |                                                          | Source                                           |                      |                                        |              |
|-----------------------------------------------------------|-----------------------------------------|----------------------------------------------------------|--------------------------------------------------|----------------------|----------------------------------------|--------------|
| High-risk for influenza-related complications             | Chronic cardiac disease                 | Acute rheumatic fever                                    | 391–392                                          | [4] Mullooly, et. al |                                        |              |
|                                                           |                                         | Chronic rheumatic heart disease                          | 393–398                                          |                      |                                        |              |
|                                                           |                                         | Hypertensive heart disease                               | 402, 404                                         |                      |                                        |              |
|                                                           |                                         | Ischemic heart disease                                   | 410–414                                          |                      |                                        |              |
|                                                           |                                         | Diseases of pulmonary circulation                        | 416, 417                                         |                      |                                        |              |
|                                                           |                                         | Other forms of heart disease                             | 421, 423, 424, 425, 427.1–427.5, 427.8, 428, 429 |                      |                                        |              |
|                                                           |                                         | Atherosclerosis, polyarteritis nodosa                    | 440, 446                                         |                      |                                        |              |
|                                                           |                                         | Congenital anomalies                                     | 745–747                                          |                      |                                        |              |
|                                                           |                                         | Surgical/device conditions                               | V42.1, V45.0, V45.81, V45.82                     |                      |                                        |              |
|                                                           |                                         | Cardiovascular syphilis                                  | 093                                              |                      |                                        |              |
|                                                           |                                         | Candidal endocarditis                                    | 11281                                            |                      |                                        |              |
|                                                           |                                         | Myocarditis due to toxoplasmosis                         | 1303                                             |                      |                                        |              |
|                                                           |                                         | Chronic pulmonary                                        | Other metabolic and immunity disorders           |                      | Other metabolic and immunity disorders | 277.0, 277.6 |
|                                                           |                                         |                                                          |                                                  |                      | COPD and allied conditions             | 491–496      |
| Pneumoconioses/other lung diseases due to external agents | 500–506, 507.0, 507.1, 508              |                                                          |                                                  |                      |                                        |              |
| Other diseases of respiratory system                      | 510, 513–517, 518.0–518.3, 519.0, 519.9 |                                                          |                                                  |                      |                                        |              |
| Congenital anomalies                                      | 748.4–748.6, 759.3                      |                                                          |                                                  |                      |                                        |              |
| Lung transplant                                           | V42.6                                   |                                                          |                                                  |                      |                                        |              |
| Tuberculosis                                              | 011, 012                                |                                                          |                                                  |                      |                                        |              |
| Diseases due to other mycobacteria                        | 031.0                                   |                                                          |                                                  |                      |                                        |              |
| Sarcoidosis                                               | 135                                     |                                                          |                                                  |                      |                                        |              |
| Chronic renal disease                                     | Hypertensive renal disease              | Hypertensive renal disease                               | 403                                              |                      |                                        |              |
|                                                           |                                         | Nephritis, nephrotic syndrome, nephrosis                 | 581–583, 585–587, 588.0, 588.1                   |                      |                                        |              |
|                                                           |                                         | Chronic pyelonephritis                                   | 590                                              |                      |                                        |              |
|                                                           |                                         | Other specified disorders of kidney and ureter           | 593.8                                            |                      |                                        |              |
|                                                           |                                         | Dialysis and transplant                                  | V42.0, V45.1, V56                                |                      |                                        |              |
| Diabetes mellitus                                         | Diabetes mellitus                       | Diabetes mellitus                                        | 250, 251, 648.0                                  |                      |                                        |              |
|                                                           |                                         | Complications of diabetes                                | 357.2, 362.0, 362.11, 366.41                     |                      |                                        |              |
| Hemoglobinopathies                                        | Anemias                                 | 282–284                                                  |                                                  |                      |                                        |              |
| Immunosuppressive disorders                               | HIV/retroviral disease                  | HIV/retroviral disease                                   | 042–044, 079.5, V08                              |                      |                                        |              |
|                                                           |                                         | Disorders involving immune mechanism                     | 279                                              |                      |                                        |              |
|                                                           |                                         | Diseases of blood and blood-forming organs               | 288.0, 288.1, 288.2                              |                      |                                        |              |
|                                                           |                                         | Polyarteritis nodosa                                     | 446                                              |                      |                                        |              |
|                                                           |                                         | Diseases of musculoskeletal system and connective tissue | 710.0, 710.2, 710.4, 714                         |                      |                                        |              |
|                                                           |                                         | Organ/tissue transplants                                 | V42.0–V42.2, V42.6–V42.9                         |                      |                                        |              |
| Malignancies                                              | Radiation/chemotherapy                  | Radiation/chemotherapy                                   | V58.0, V58.1                                     |                      |                                        |              |
|                                                           |                                         | Malignancies                                             | 140–208                                          |                      |                                        |              |
| Other metabolic and immunity disorders                    | Disorders of adrenal glands             | Disorders of adrenal glands                              | 255,                                             |                      |                                        |              |
|                                                           |                                         | Other disorders                                          | 270, 271, 277.2, 277.3, 277.5, 277.8             |                      |                                        |              |
| Liver diseases                                            | Chronic liver disease and cirrhosis     | Chronic liver disease and cirrhosis                      | 571                                              |                      |                                        |              |
|                                                           |                                         | Liver abscess and sequelae of chronic liver disease      | 572.1–572.8                                      |                      |                                        |              |

| Parameter                                                                                                                                   |                                | Source                                      |                                        |                                    |
|---------------------------------------------------------------------------------------------------------------------------------------------|--------------------------------|---------------------------------------------|----------------------------------------|------------------------------------|
| High-risk for influenza-related complications<br>(continued)                                                                                | Neurological / musculoskeletal | Psychotic conditions                        | 290, 294.1                             | [5] Mullooly, et. al               |
|                                                                                                                                             |                                | Mental retardation                          | 318.1, 318.2                           |                                    |
|                                                                                                                                             |                                | Hereditary and degenerative diseases of CNS | 330, 331, 333.0, 333.4-333.9, 334, 335 |                                    |
|                                                                                                                                             |                                | Other disorders of CNS                      | 340, 341, 343, 344.0                   |                                    |
|                                                                                                                                             |                                | Disorders of peripheral nervous system      | 358.0, 358.1, 359.1, 359.2             |                                    |
|                                                                                                                                             |                                | Late effects of CVD                         | 438                                    |                                    |
|                                                                                                                                             |                                | Chondrodystrophy                            | 756.4                                  |                                    |
| Proportion of employed Veterans, 2014                                                                                                       |                                | 18-49                                       | 73.8%                                  | [11] US Bureau of Labor Statistics |
|                                                                                                                                             |                                | 50-64                                       | 64.8%                                  |                                    |
|                                                                                                                                             |                                | 65+                                         | 18.8%                                  |                                    |
| Mean daily occupational wage in US dollars, 2014                                                                                            |                                | All                                         | \$182                                  | [12] US Bureau of Labor Statistics |
| Utility scores                                                                                                                              | Male                           | 20-29                                       | 0.922                                  | [15] Hanmer, et. al                |
|                                                                                                                                             |                                | 30-39                                       | 0.912                                  |                                    |
|                                                                                                                                             |                                | 40-49                                       | 0.880                                  |                                    |
|                                                                                                                                             |                                | 50-59                                       | 0.853                                  |                                    |
|                                                                                                                                             |                                | 60-69                                       | 0.827                                  |                                    |
|                                                                                                                                             |                                | 70-79                                       | 0.788                                  |                                    |
|                                                                                                                                             |                                | 80-89                                       | 0.757                                  |                                    |
|                                                                                                                                             | Female                         | 20-29                                       | 0.905                                  |                                    |
|                                                                                                                                             |                                | 30-39                                       | 0.886                                  |                                    |
|                                                                                                                                             |                                | 40-49                                       | 0.855                                  |                                    |
|                                                                                                                                             |                                | 50-59                                       | 0.829                                  |                                    |
|                                                                                                                                             |                                | 60-69                                       | 0.800                                  |                                    |
|                                                                                                                                             |                                | 70-79                                       | 0.758                                  |                                    |
|                                                                                                                                             |                                | 80-89                                       | 0.701                                  |                                    |
| Proportion of estimated influenza-attributed all-cause deaths in the mean annual number of all-cause deaths                                 | High-risk                      | 18-49                                       | 9.21%                                  | This study                         |
|                                                                                                                                             |                                | 50-64                                       | 6.33%                                  |                                    |
|                                                                                                                                             |                                | 65+                                         | 4.06%                                  |                                    |
|                                                                                                                                             | Low-risk                       | 18-49                                       | 0.05%                                  |                                    |
|                                                                                                                                             |                                | 50-64                                       | 0.29%                                  |                                    |
|                                                                                                                                             |                                | 65+                                         | 0.73%                                  |                                    |
| Proportion of estimated influenza-attributed cardiovascular and respiratory (adjusted) deaths in the mean annual number of all-cause deaths | High-risk                      | 18-49                                       | 3.50%                                  | This study                         |
|                                                                                                                                             |                                | 50-64                                       | 3.21%                                  |                                    |
|                                                                                                                                             |                                | 65+                                         | 2.87%                                  |                                    |
|                                                                                                                                             | Low-risk                       | 18-49                                       | 0.45%                                  |                                    |
|                                                                                                                                             |                                | 50-64                                       | 0.11%                                  |                                    |
|                                                                                                                                             |                                | 65+                                         | 0.72%                                  |                                    |
