# Supplementary material for: The Annual Burden of Seasonal Influenza in the US Veterans Affairs Population
Source: PubMed Central journal article supplement (PMC5207669; doi:10.1371/journal.pone.0169344), 2017-01-03
Supplement: pone.0169344.s004.pdf [file pone.0169344.s004.pdf]

| Characteristic |                                             | 2010       |           | 2011       |           | 2012       |           | 2013       |           | 2014       |           |       |
|----------------|---------------------------------------------|------------|-----------|------------|-----------|------------|-----------|------------|-----------|------------|-----------|-------|
|                |                                             | N          | %         | N          | %         | N          | %         | N          | %         | N          | %         |       |
| Total patients |                                             | 5,294,641  |           | 5,444,514  |           | 5,559,011  |           | 5,650,398  |           | 5,754,615  |           |       |
| Age            | 18-49                                       | 1,064,576  | 20.1%     | 1,112,468  | 20.4%     | 1,163,619  | 20.9%     | 1,222,516  | 21.6%     | 1,279,944  | 22.2%     |       |
|                | 50-64                                       | 1,676,091  | 31.7%     | 1,600,396  | 29.4%     | 1,507,383  | 27.1%     | 1,423,041  | 25.2%     | 1,382,743  | 24.0%     |       |
|                | 65+                                         | 2,553,974  | 48.2%     | 2,731,650  | 50.2%     | 2,888,009  | 52.0%     | 3,004,841  | 53.2%     | 3,091,928  | 53.7%     |       |
| Gender         | Female                                      | 476,099    | 9.0%      | 491,273    | 9.0%      | 512,994    | 9.2%      | 541,115    | 9.6%      | 559,929    | 9.7%      |       |
|                | Male                                        | 4,818,538  | 91.0%     | 4,953,231  | 91.0%     | 5,046,014  | 90.8%     | 5,109,278  | 90.4%     | 5,194,680  | 90.3%     |       |
|                | Other/Unknown                               | 4          | 0.0%      | 10         | 0.0%      | 3          | 0.0%      | 5          | 0.0%      | 6          | 0.0%      |       |
| Race           | White                                       | 3,449,664  | 65.2%     | 3,569,795  | 65.6%     | 3,653,524  | 65.7%     | 3,704,069  | 65.6%     | 3,766,459  | 65.5%     |       |
|                | African-American                            | 742,366    | 14.0%     | 786,905    | 14.5%     | 823,838    | 14.8%     | 856,132    | 15.2%     | 889,132    | 15.5%     |       |
|                | Hispanic                                    | 258,319    | 4.9%      | 272,393    | 5.0%      | 285,753    | 5.1%      | 299,646    | 5.3%      | 316,504    | 5.5%      |       |
|                | Other/Missing                               | 844,292    | 15.9%     | 815,421    | 15.0%     | 795,896    | 14.3%     | 790,551    | 14.0%     | 782,520    | 13.6%     |       |
| Region*        | West                                        | 863,876    | 16.3%     | 889,696    | 16.3%     | 914,541    | 16.5%     | 938,857    | 16.6%     | 971,830    | 16.9%     |       |
|                | Central                                     | 1,322,067  | 25.0%     | 1,360,006  | 25.0%     | 1,394,885  | 25.1%     | 1,412,265  | 25.0%     | 1,432,860  | 24.9%     |       |
|                | South                                       | 1,868,141  | 35.3%     | 1,940,617  | 35.6%     | 1,988,212  | 35.8%     | 2,027,728  | 35.9%     | 2,073,877  | 36.0%     |       |
|                | East                                        | 1,240,557  | 23.4%     | 1,254,195  | 23.0%     | 1,261,373  | 22.7%     | 1,271,548  | 22.5%     | 1,276,048  | 22.2%     |       |
| Utilization    | Patients with at least one hospitalization  | 371,477    | 7.0%      | 375,596    | 6.9%      | 375,290    | 6.8%      | 375,782    | 6.7%      | 384,918    | 6.7%      |       |
|                | Total hospitalizations                      | 573,935    |           | 580,243    |           | 573,839    |           | 575,649    |           | 591,935    |           |       |
|                | Patients with at least one outpatient visit | 4,657,684  | 88.0%     | 4,794,046  | 88.1%     | 4,908,231  | 88.3%     | 4,979,975  | 88.1%     | 5,085,233  | 88.4%     |       |
|                | Total outpatient visits                     | 59,395,869 |           | 62,821,913 |           | 65,632,501 |           | 68,039,765 |           | 72,269,402 |           |       |
|                | Median no. of outpatient visits per patient | 7          | 3-15      | 7          | 3-16      | 7          | 3-16      | 7          | 3-17      | 8          | 3-18      |       |
| Risk           | High                                        | 18-49      | 123,537   | 2.3%       | 123,963   | 2.3%       | 126,979   | 2.3%       | 129,062   | 2.3%       | 136,645   | 2.4%  |
|                |                                             | 50-64      | 640,472   | 12.1%      | 598,326   | 11.0%      | 550,984   | 9.9%       | 501,359   | 8.9%       | 477,849   | 8.3%  |
|                |                                             | 65+        | 1,274,930 | 24.1%      | 1,351,893 | 24.8%      | 1,425,998 | 25.7%      | 1,472,111 | 26.1%      | 1,515,634 | 26.3% |
|                | Low                                         | 18-49      | 941,039   | 17.8%      | 988,505   | 18.2%      | 1,036,640 | 18.6%      | 1,093,454 | 19.4%      | 1,143,299 | 19.9% |
|                |                                             | 50-64      | 1,035,619 | 19.6%      | 1,002,070 | 18.4%      | 956,399   | 17.2%      | 921,682   | 16.3%      | 904,894   | 15.7% |
|                |                                             | 65+        | 1,279,044 | 24.2%      | 1,379,757 | 25.3%      | 1,462,011 | 26.3%      | 1,532,730 | 27.1%      | 1,576,294 | 27.4% |

\*West: AK, AZ, CA, CO, HI, ID, MT, NM, NV, OR, UT, WA, WY; Central: AR, IA, IL, KS, LA, MN, MO, ND, NE, OK, SD, TX, WI  
South: AL, Washington DC, FL, GA, KY, MS, NC, PR, SC, TN, VA, WV; East: CT, DE, IN, MA, MD, ME, MI, NH, NJ, NY, OH, PA, RI, VT
